# Supplementary material
Source: PubMed Central journal article supplement (PMC7798361)

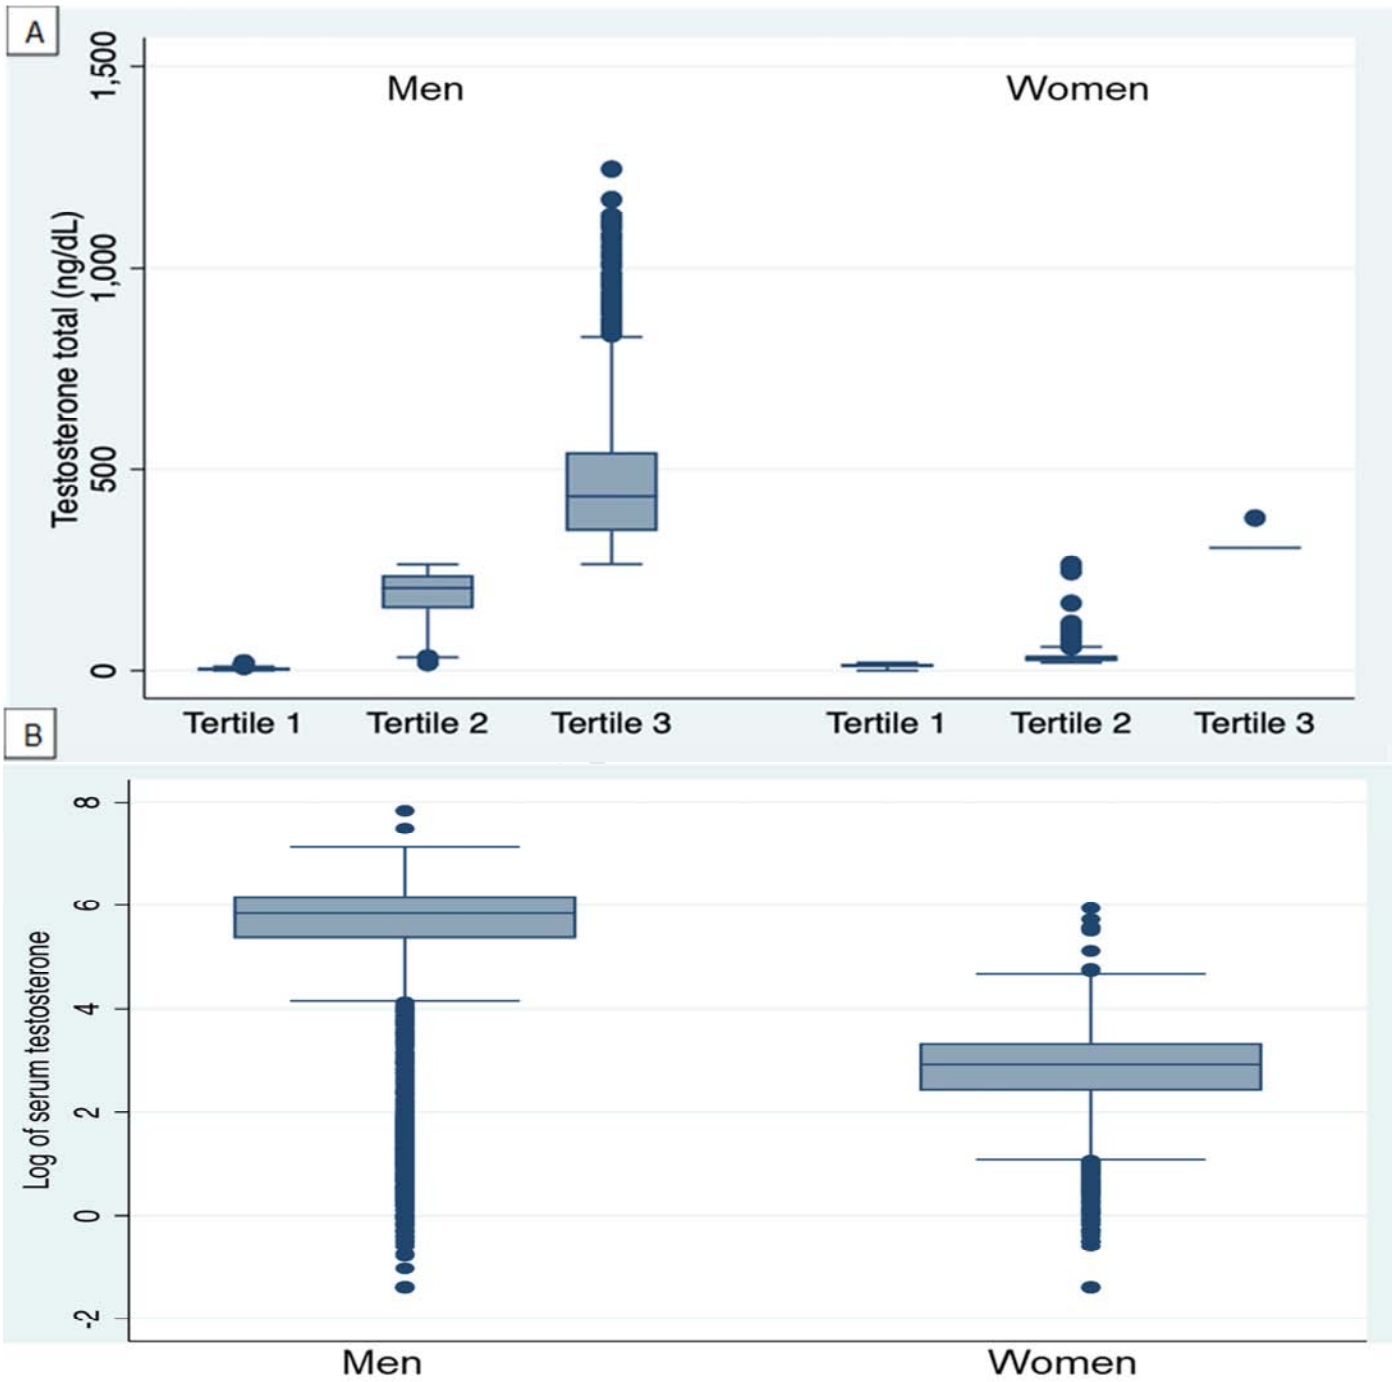

Supplement: NIHMS1599675-supplement-3.pdf [file NIHMS1599675-supplement-3.pdf]
